# Supplementary material for: Multi-tissue transcriptome analysis using hybrid-sequencing reveals potential genes and biological pathways associated with azadirachtin A biosynthesis in neem (azadirachta indica)
Source: BMC Genomics. 2020 Oct 28;21:749. doi: 10.1186/s12864-020-07124-6 (PMC7592523; doi:10.1186/s12864-020-07124-6)
Supplement: Supplementary file 7 — Additional file 7 Table S5. Pathways and number of unigenes related to secondary metabolites in A. indica. [file 12864_2020_7124_MOESM7_ESM.xlsx]

## Sheet: Sheet1
	Table S5. Pathways and number of unigenes related to secondary metabolites in A. indica
	Biosynthesis of secondary metabolites pathway	Pathway ID	All genes with pathway annotation (16778)
	Anthocyanin biosynthesis	ko00942	5 (0.03%)
	Benzoxazinoid biosynthesis	ko00402	7 (0.04%)
	Betalain biosynthesis	ko00965	1 (0.01%)
	Brassinosteroid biosynthesis	ko00905	7 (0.04%)
	Caffeine metabolism	ko00232	9 (0.05%)
	Carotenoid biosynthesis	ko00906	40 (0.24%)
	Cyanoamino acid metabolism	ko00460	48 (0.29%)
	Diterpenoid biosynthesis	ko00904	38 (0.23%)
	Flavone and flavonol biosynthesis	ko00944	19 (0.11%)
	Flavonoid biosynthesis	ko00941	74 (0.44%)
	Indole alkaloid biosynthesis	ko00901	8 (0.05%)
	Isoflavonoid biosynthesis	ko00943	16 (0.1%)
	Isoquinoline alkaloid biosynthesis	ko00950	26 (0.15%)
	Monoterpenoid biosynthesis	ko00902	14 (0.08%)
	Monobactam biosynthesis	ko00261	18 (0.11%)
	Nicotinate and nicotinamide metabolism	ko00760	22 (0.13%)
	Phenylpropanoid biosynthesis	ko00940	149 (0.89%)
	Sesquiterpenoid and triterpenoid biosynthesis	ko00909	25 (0.15%)
	Steroid biosynthesis	ko00100	63 (0.38%)
	Stilbenoid, diarylheptanoid and gingerol biosynthesis	ko00945	69 (0.41%)
	Terpenoid backbone biosynthesis	ko00900	63 (0.38%)
	Tropane, piperidine and pyridine alkaloid biosynthesis	ko00960	26 (0.15%)
